# Supplementary material for: Pyroptosis-related gene mediated modification patterns and immune cell infiltration landscapes in cutaneous melanoma to aid immunotherapy
Source: publisher site journal article supplement (doi:10.18632/aging.203687), 2021-11-09
Supplement: Supplementary file [file aging-v13i21-203687-supplementary-material-SD2.pdf]

## SUPPLEMENTARY TABLES

**Supplementary Table 1. The 33 original pyroptosis-related genes that were used in this study.**

| <b>Genes</b> | <b>Name</b>                                            |
|--------------|--------------------------------------------------------|
| AIM2         | Absent in melanoma 2                                   |
| CASP1        | cysteine-aspartic acid protease-1                      |
| CASP3        | cysteine-aspartic acid protease-3                      |
| CASP4        | cysteine-aspartic acid protease-4                      |
| CASP5        | cysteine-aspartic acid protease-5                      |
| CASP6        | cysteine-aspartic acid protease-6                      |
| CASP8        | cysteine-aspartic acid protease-8                      |
| CASP9        | cysteine-aspartic acid protease-9                      |
| ELANE        | elastase, neutrophil expressed                         |
| GPX4         | glutathione peroxidase 4                               |
| GSDMA        | gasdermin A                                            |
| GSDMB        | gasdermin B                                            |
| GSDMC        | gasdermin C                                            |
| GSDMD        | gasdermin D                                            |
| GSDME        | gasdermin E                                            |
| IL18         | interleukin 18                                         |
| IL1B         | interleukin 1 beta                                     |
| IL6          | interleukin 6                                          |
| NLRC4        | NLR family CARD domain containing 4                    |
| NLRP1        | NLR family pyrin domain containing 1                   |
| NLRP2        | NLR family pyrin domain containing 2                   |
| NLRP3        | NLR family pyrin domain containing 3                   |
| NLRP6        | NLR family pyrin domain containing 6                   |
| NLRP7        | NLR family pyrin domain containing 7                   |
| NOD1         | nucleotide binding oligomerization domain containing 1 |
| NOD2         | nucleotide binding oligomerization domain containing 2 |
| PJVK         | pejvakin/deafness, autosomal recessive 59              |
| PLCG1        | phospholipase C gamma 1                                |
| PRKACA       | protein kinase cAMP-activated catalytic subunit alpha  |
| PYCARD       | PYD and CARD domain containing                         |
| SCAF11       | SR-related CTD associated factor 11                    |
| TIRAP        | TIR domain containing adaptor protein                  |
| TNF          | tumor necrosis factor                                  |

**Supplementary Table 2. Univariate versus multivariate Cox regression analysis to identify different clinical parameters prognostic value.**

| Variables        | Univariate analysis |              |         | Multivariate analysis |             |         |
|------------------|---------------------|--------------|---------|-----------------------|-------------|---------|
|                  | HR                  | 95%CI        | P-value | HR                    | 95%CI       | P-value |
| Age              | 1.099               | 1.009- 1.031 | <0.001  | 1.011                 | 1.000-1.022 | 0.044   |
| Gender           | 0.993               | 0.719- 1.373 | 0.968   | 0.980                 | 0.706-1.360 | 0.902   |
| T                | 1.480               | 1.278-1.714  | <0.001  | 1.404                 | 1.209-1.629 | <0.001  |
| N                | 1.440               | 1.239-1.675  | <0.001  | 1.504                 | 1.284-1.762 | <0.001  |
| M                | 1.923               | 0.847- 4.362 | <0.118  | 1.723                 | 0.731-4.058 | <0.213  |
| Pyroptosis score | 0.985               | 0.979- 0.992 | <0.001  | 0.988                 | 0.982-0.995 | <0.001  |
